# Supplementary material for: High photoelectrocatalytic performance of a MoS2–SiC hybrid structure for hydrogen evolution reaction
Source: Royal Society of Chemistry journal article supplement (doi:10.1039/c3ta10600d), 2013-01-01
Supplement: c3ta10600d.pdf [file c3ta10600d.pdf]

## **High Photoelectrocatalytic Performance of MoS<sub>2</sub>/SiC Hybrid Structure for Hydrogen Evolution Reaction**

Xiaoning Guoa, Chengmeng Chena, Yunwei Wanga,b, Xili Tonga, Guoqiang Jina,  
and Xiang-Yun Guoa,\*

<sup>a</sup> State Key Laboratory of Coal Conversion, Institute of Coal Chemistry, Taiyuan  
030001, PR China

<sup>b</sup> University of the Chinese Academy of Sciences, Beijing 100039, PR China

\*Corresponding author:

Fax/Tel: +86-351 4065282

Email: xyguo@sxicc.ac.cn (X. Y. Guo)

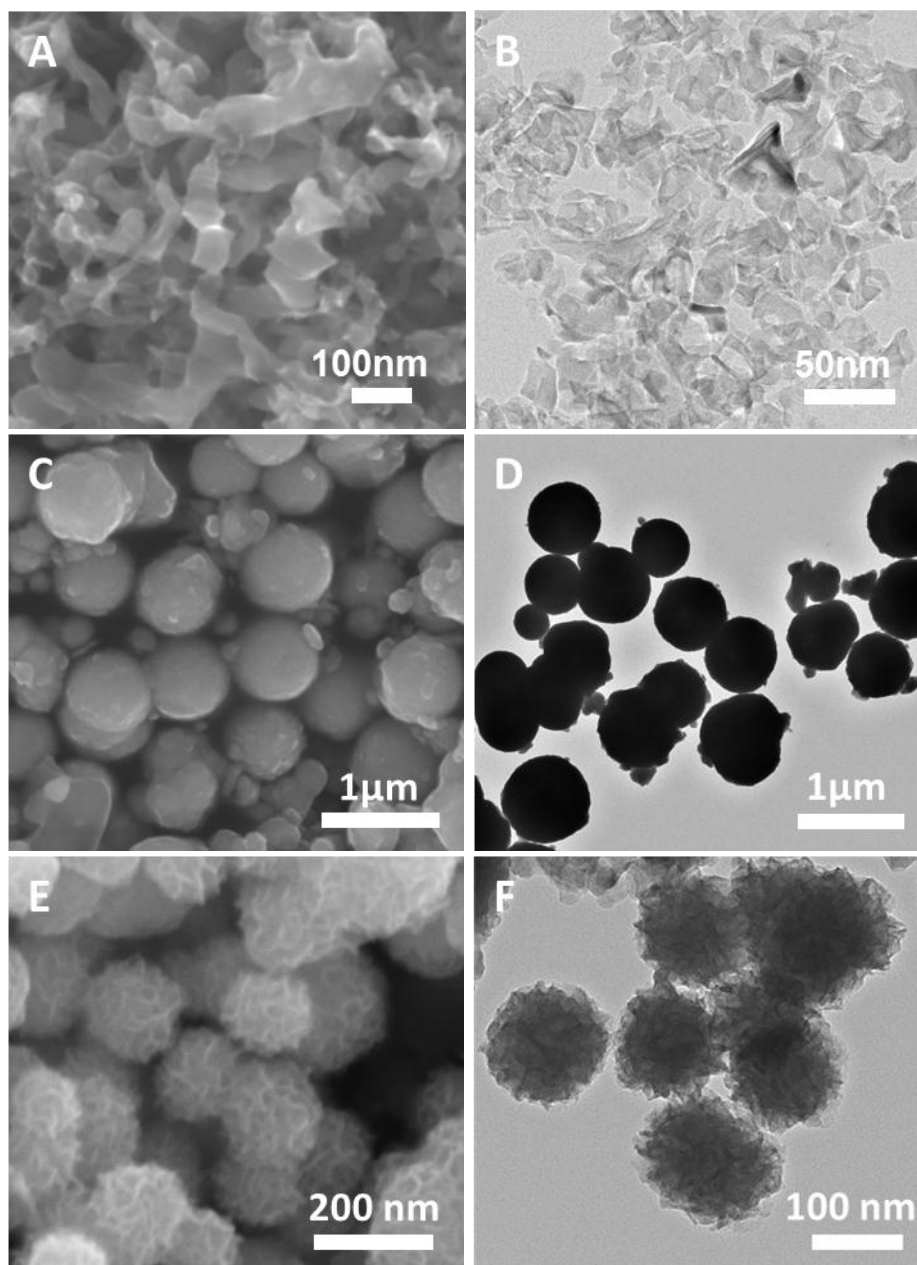

**Fig. S1.** SEM and TEM images of SiC nanosheets before (A) and after (B) etching, free MoS<sub>2</sub> (C, D) and the MoS<sub>2</sub>/SiC hybrid (E, F). The free MoS<sub>2</sub> are 3D-like spherical particles and their surfaces are almost smooth, whereas the MoS<sub>2</sub>/SiC hybrid is composed of uniformly flower-like spheres assembled by folded flakes with thickness of about several nanometers.

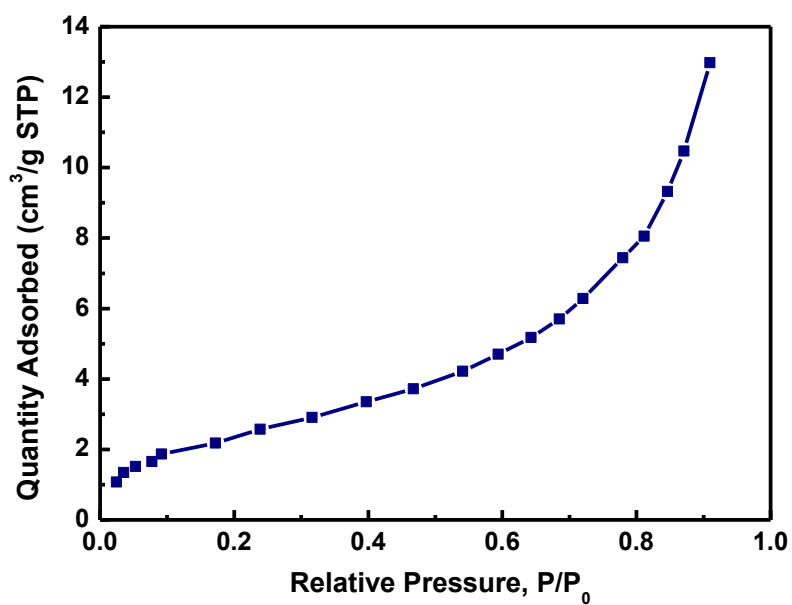

**Fig. S2.** Adsorption isotherm of p-xylene vapor on the MoS<sub>2</sub>/SiC hybrid. The equilibrium adsorption value is only 13.0 cm<sup>3</sup>/g, which is far less than the value for water vapor (104.6 cm<sup>3</sup>/g), indicating that the nanopores in the hybrid catalyst are strongly favorable to the adsorption of H<sub>2</sub>O molecules.

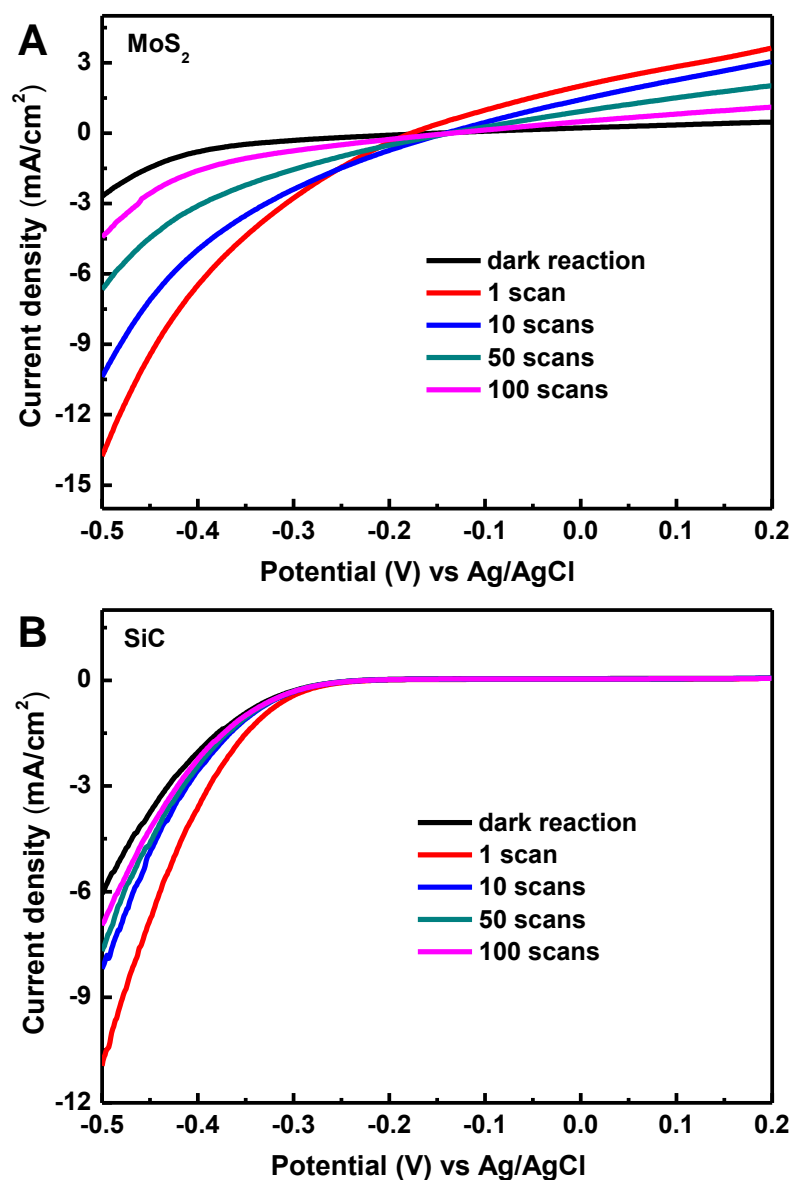

**Fig. S3.** The photoelectric conversion efficiency and catalytic stability of free MoS<sub>2</sub> and SiC. Both MoS<sub>2</sub> and SiC can effectively response visible light and generate photocurrent. However, MoS<sub>2</sub> and SiC showed a high overpotential ( $\eta$ ) of about 0.2 and 0.32 V at the first scan for HER, suggesting that their catalytic activities are less than the MoS<sub>2</sub>/SiC (0.04V). Meanwhile, either MoS<sub>2</sub> or SiC shows poor catalytic stability, and the current density rapidly decreases with the scan times.

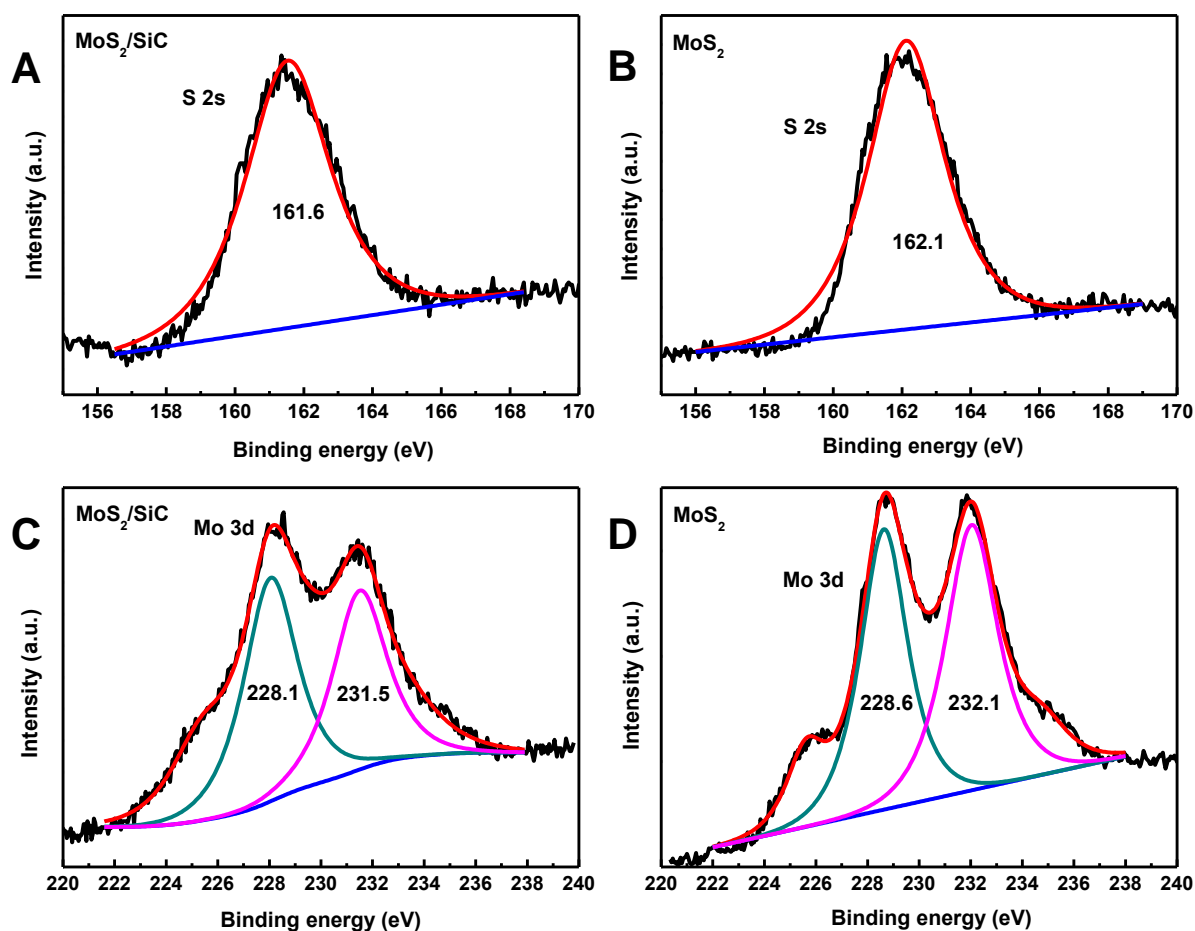

**Fig. S4.** XPS spectra of S<sub>2s</sub> (A and B) and Mo<sub>3d</sub> (C and D) levels of the MoS<sub>2</sub>/SiC hybrid and free MoS<sub>2</sub> particles. Both the S<sub>2s</sub> and Mo<sub>3d</sub> BE values of MoS<sub>2</sub>/SiC are lower than those of free MoS<sub>2</sub>, suggesting that electron cloud densities around those atoms increase.

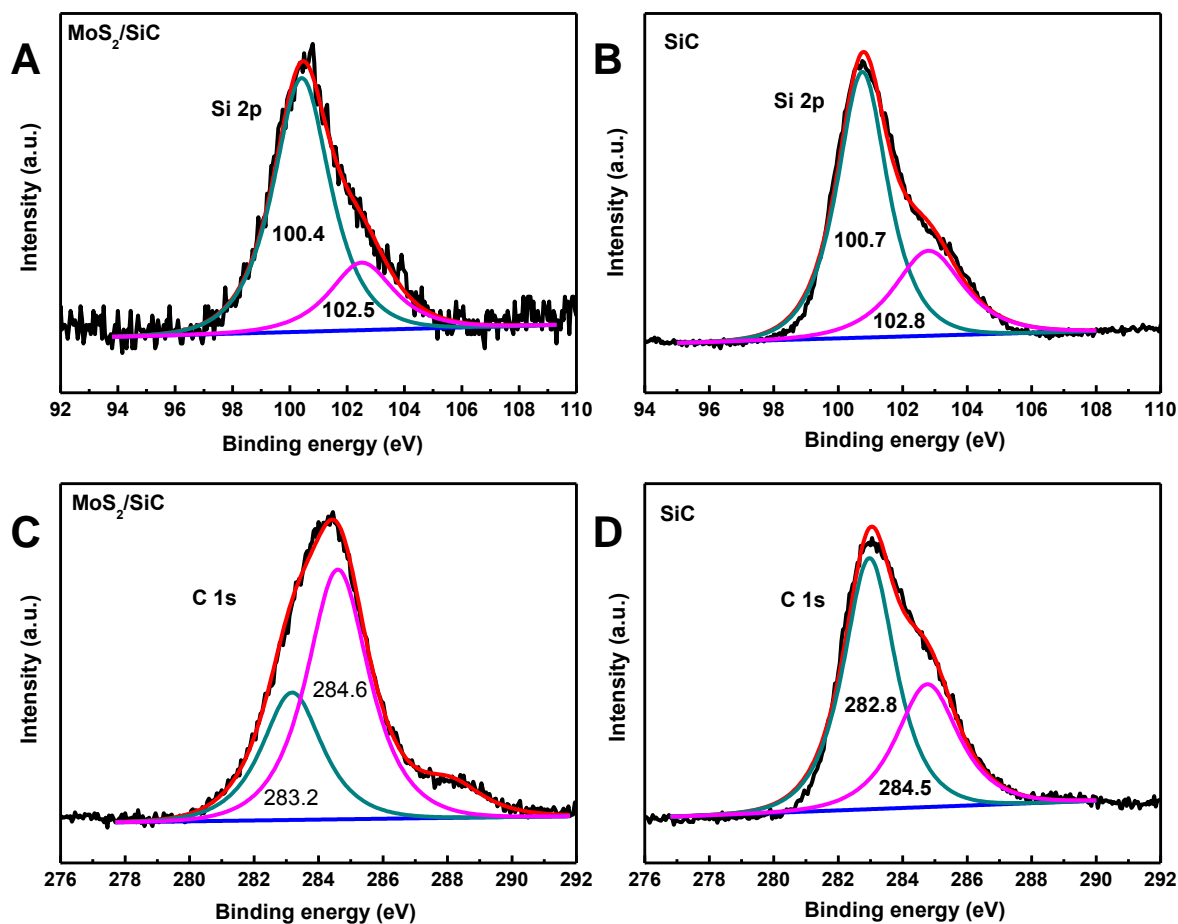

**Fig. S5.** XPS spectra of Si<sub>2p</sub> (A and B) and C<sub>1s</sub> (C and D) levels of the MoS<sub>2</sub>/SiC hybrid and free SiC. The Si<sub>2p</sub> BE value of MoS<sub>2</sub>/SiC is lower than that of free SiC, suggesting that the electron cloud density around Si increases. While the C<sub>1s</sub> peaks in the MoS<sub>2</sub>/SiC shift to higher binding energies comparing with free SiC, indicating that the surrounding electrons of C have transferred to other atoms.
